# Supplementary material for: Impact of Various Atrial Fibrillation Treatment Strategies on Length of Stay in the Emergency Department and Early Complications—3 Years of a Single-Center Experience
Source: MDPI journal article supplement (doi:10.3390/jcm13010190), 2023-12-29
Supplement: s1 [file s1]

## Supplementary Materials

**Table S1. Complications of cardioversion and procedural sedation analgesia.**

COMB - combined strategy, F - female, S.C. - synchronized cardioversion, Mg - Magnesium sulfate, M - male, MED - medications only strategy, SH - shock only strategy, TRD - transient respiratory depression requiring temporary ventilation

| age | sex | complication   | intervention<br>directly<br>preceding the<br>incident | medications administered before the incident | strategy   | sinu rhythm<br>restored? | admission? |
|-----|-----|----------------|-------------------------------------------------------|----------------------------------------------|------------|--------------------------|------------|
| 75  | K   | cardiac arrest | S.C.                                                  | propofol 60mg , fentanyl 100 mcg             | shock only | no                       | yes        |
| 68  | M   | TRD            | PSA                                                   | fentanyl 100 mcg, propofol 150 mg,           | shock only | yes                      | no         |
| 66  | M   | bradycardia    | amiodarone                                            | amiodarone 300 mg, antazoline 200 mg, Mg 2g, | meds only  | no                       | no         |
| 81  | K   | bradycardia    | antazoline                                            | antazoline 200 mg, Mg 2g, metoprolol 5 mg    | meds only  | yes                      | no         |
| 66  | M   | bradycardia    | propafenone                                           | antazoline 200 mg, propafenone 105 mg        | meds only  | no                       | no         |

|    |   |             |             |                                                           |           |     |     |
|----|---|-------------|-------------|-----------------------------------------------------------|-----------|-----|-----|
| 90 | K | SVT         | antazoline  | antaoline 200 mg, amiodarone 300 mg, Mg 2g                | meds only | no  | no  |
| 74 | K | SVT         | antazoline  | antazoline 200 mg, metoprolol 5 mg                        | meds only | yes | no  |
| 63 | M | bradycardia | amiodarone  | amiodarone 300 mg                                         | combined  | yes | no  |
| 79 | K | bradycardia | propafenone | antazoline 200 mg, propafenone 150 mg                     | combined  | no  | yes |
| 45 | M | bradycardia | S.C.        | propafenone 140mg, Mg 2g, propofol 80 mg, fentanyl 150 mg | combined  | yes | yes |
| 75 | M | bradycardia | S.C.        | amiodarone 450 mg, metoprolol 5 mg, Mg 2g                 | combined  | yes | yes |
| 72 | K | chest pain  | antazoline  | antazoline 200mg, Mg 2g                                   | combined  | yes | no  |
| 70 | M | hypotension | amiodarone  | amiodarone 300 mg, Mg 2g                                  | combined  | yes | no  |
| 49 | M | hypotension | antazoline  | metoprolol 5 mg, antazoline 200 mg                        | combined  | yes | no  |
| 75 | K | hypotension | propafenone | antazoline 200 mg, propafenone 70 mg                      | combined  | yes | no  |
| 59 | M | SVT         | antazoline  | antazoline 200 mg, Mg 2g                                  | combined  | yes | no  |
| 65 | M | TRD         | PSA         | amiodarone 300mg, propofol 110mg, fentanyl 100 mcg        | combined  | yes | no  |

|    |   |     |     |                                                     |          |     |    |
|----|---|-----|-----|-----------------------------------------------------|----------|-----|----|
| 66 | M | TRD | PSA | antazoline 200mg, metoprolol 5 mg                   | combined | yes | no |
| 65 | M | TRD | PSA | antazoline 200 mg, fentanyl 100 mg, propofol 100 mg | combined | yes | no |
